# Supplementary material for: Ultrathin and large-sized vanadium oxide nanosheets mildly prepared at room temperature for high performance fiber-based supercapacitors
Source: Royal Society of Chemistry journal article supplement (doi:10.1039/c6ta10619f), 2017-01-01
Supplement: c6ta10619f1.pdf [file c6ta10619f1.pdf]

## Supporting Information

### **Ultrathin and Large-Sized Vanadium Oxide Nanosheets Mildly Prepared at Room Temperature for High Performance Fiber-Based Supercapacitor**

Li Hua,<sup>a</sup> Zhongyuan Ma,<sup>a</sup> Peipei Shi,<sup>a</sup> Li Li,<sup>a</sup> Kun Rui,<sup>a</sup> Jinyuan Zhou,<sup>b</sup> Xiao Huang,<sup>a</sup> Xiang Liu,<sup>a</sup> Jixin Zhu,<sup>\*a</sup> Gengzhi Sun,<sup>\*a</sup> and Wei Huang<sup>\*ac</sup>

<sup>a</sup>Key Laboratory of Flexible Electronics (KLOFE) & Institute of Advanced Materials (IAM), Jiangsu National Synergetic Innovation Center for Advanced Materials (SICAM), Nanjing Tech University (NanjingTech), 30 South Puzhu Road, Nanjing 211816, China. E-mail: iamgzsun@njtech.edu.cn, iamjxzhou@njtech.edu.cn, iamwhuang@njtech.edu.cn

<sup>b</sup>School of Physical Science and Technology, Lanzhou University, 222 South Tianshui Road, Lanzhou 730000, China

<sup>c</sup>Key Laboratory for Organic Electronics and Information Displays & Institute of Advanced Materials (IAM), Jiangsu National Synergetic Innovation Center for Advanced Materials (SICAM), Nanjing University of Posts and Telecommunications (NUPT), 9 Wenyuan Road, Nanjing 210023, China

## Experimental Section

### Chemicals:

Polyvinyl alcohol (PVA, MW 85 000-124 000) was obtained from Sigma-Aldrich. Vanadium oxide powder ( $V_2O_5$ , 99.2%), hydrogen peroxide ( $H_2O_2$ , 30 wt%), and lithium chloride (LiCl, >99%) were purchased from Alfa Aesar, Sinopharm Chemical Reagent Co., Ltd, and Adamas-Beta, respectively. Ethanol ( $\geq 99.7\%$ ) was purchased from Shanghai Ling Feng Chemical Reagent Co., Ltd. All chemicals were used as received. The purity of  $C_2H_4$  and Ar is 99.95% and 99.99%, respectively.

### Preparation of ultrathin and large sized $V_2O_5$ nanosheets:

The commercial  $V_2O_5$  bulk was mixed with deionized water and  $H_2O_2$  (30 wt%) with a volume ratio of 5:1 to get a transparent red solution associated with release of  $O_2$  bubbles. The mixture was maintained at room temperature for 20 hours and a viscous gel consisted of highly concentrated  $V_2O_5$  ultrathin nanosheets was formed. The  $V_2O_5$  nanosheets were then dispersed in deionized (DI) water/ethanol mixed solution (volume ration of 1:1) with a concentration of  $6 \text{ mg mL}^{-1}$  and  $0.6 \text{ mg mL}^{-1}$  for the fabrication of fiber electrode. The freeze-dried  $V_2O_5$  nanosheets were prepared for structural and morphological characterization.

### Fabrication of MWCNT/ $V_2O_5$ /MWCNT fibers:

The spinnable MWCNT array was grown by chemical vapor deposition (CVD) in a quartz tube furnace at  $750 \text{ }^\circ\text{C}$  for 10 min. A 1 nm Fe film deposited on a Si/SiO<sub>2</sub> substrate was used as the catalyst. Ar (155 sccm) and  $C_2H_4$  (45 sccm) were used as the carrier gas and carbon source, respectively. The well-aligned MWCNT thin film was obtained by drawing the MWCNT array using a scotch tape. The areal density of well-aligned MWCNT film was determined to be  $2.12 \text{ } \mu\text{g cm}^{-2}$  via the utilization of an ultra-accurate microbalance (METTLER TOLEDO, Mx5) with a readability of  $1 \text{ } \mu\text{g}$ . Two-layer of the obtained MWCNT thin films with width of  $\sim 1.5 \text{ mm}$  and length of  $\sim 8.5 \text{ cm}$  were first stacked onto a polytetrafluoroethylene (PTFE) substrate. The  $V_2O_5$  suspension was then drop-casted onto the MWCNT thin film. After it was dried, another two-layer of MWCNT thin films were laid on top forming a sandwiched hybrid film. Subsequently, this hybrid film was peeled off from the PTFE substrate and twisted into a fiber with a motor rotating at 200 rpm for 2 min. The obtained hybrid fibers were thermally annealed at  $350 \text{ }^\circ\text{C}$  for 3.5 h to obtain MWCNT/ $V_2O_5$ /MWCNT fiber. The content of  $V_2O_5$  nanosheets can be controlled by simply adjusting the drop-casting process.

### Fabrication of the fiber-based supercapacitors:

The solid-state fiber-based supercapacitors were fabricated and tested in two-electrode configuration similar to our previous study. Typically, two MWCNT/ $V_2O_5$ /MWCNT fibers were placed in parallel on a polyethylene terephthalate (PET) substrate with a gap of  $\sim 0.5 \text{ mm}$ , and then coated with polyvinyl alcohol (PVA)-LiCl gel electrolyte. The PVA-LiCl gel electrolyte was prepared by mixing LiCl (6 M, 10 mL) with PVA powder (1 g, MW 85 000-124 000; Sigma Aldrich) followed by heating at  $90 \text{ }^\circ\text{C}$  with vigorous stirring to obtain a homogeneous gel-like suspension. Ag paste served as the conductive pads for electrochemical measurements was applied at both ends of the fibers.

### Characterization:

The morphology and structure of the samples were obtained using scanning electron microscope (SEM, JEOL 6500), transmission electron microscope (TEM, JEOL 2100), X-ray diffraction (XRD, Rigaku D/Max Ultima II powder X-ray diffractometer), Raman spectroscopy (Ranishaw inVia, 633 nm), X-ray photoelectron spectroscopy (XPS, PHI Quantera X-ray photoelectron spectrometer). The mechanical properties were measured using a universal testing instrument (HY-0350) with a maximum force of 5 N. The tensile tests were performed at a strain rate of  $0.6 \text{ mm s}^{-1}$  with a gauge length of 6 mm. The electrical properties were characterized using Keithley 2400. The electrochemical measurements were obtained using a CHI 660D electrochemical work station. The specific volumetric capacitance ( $C_V$ ) of fiber-based supercapacitor was calculated from the galvanostatic charge-discharge curve according to the equation of  $C_V = [i/(dV/dt)]/V_{fiber}$ , where  $i$  is the discharge current,  $dV/dt$  is the slope of discharge curve, and  $V_{fiber}$  is the total volume of two fibers.

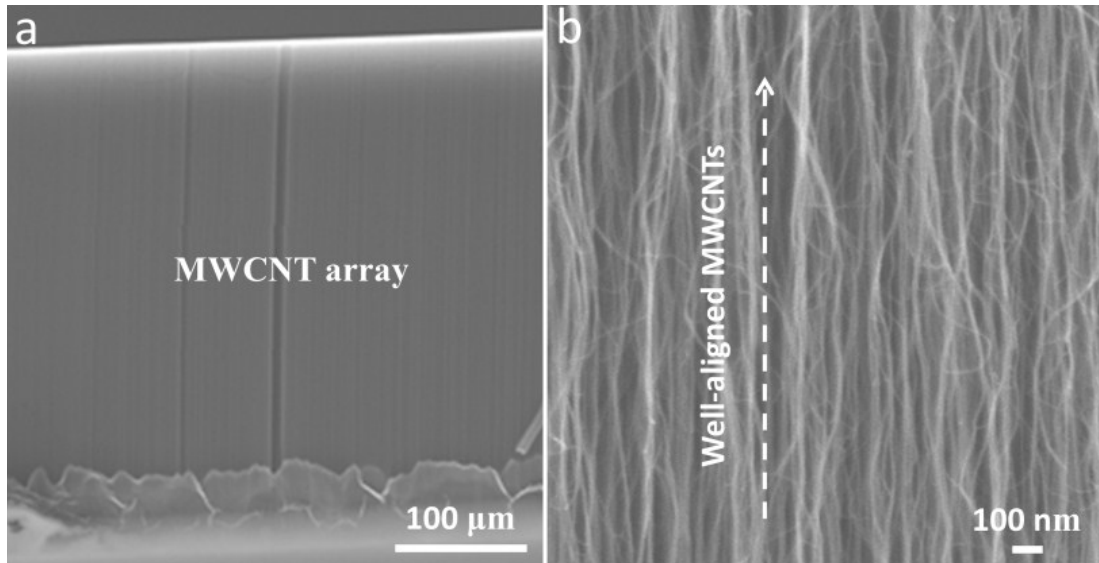

**Fig. S1** (a) SEM image of vertical MWCNT array. (b) Magnified SEM image of well-aligned MWCNTs in the array. The white arrow indicates the orientation of MWCNTs.

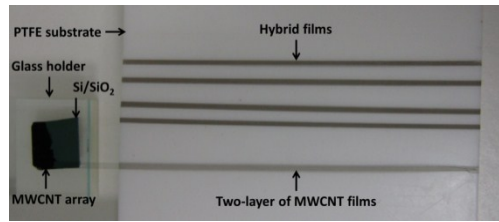

**Fig. S2** Photograph of thin MWCNT film continuously drawn out from vertical MWCNT array.

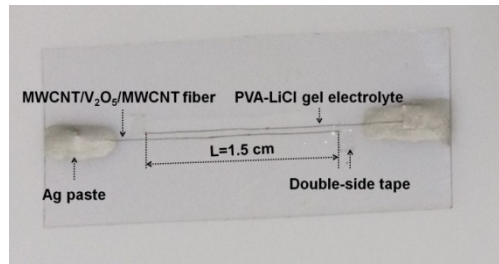

**Fig. S3** Photograph of the MWCNT/V<sub>2</sub>O<sub>5</sub>/MWCNT fiber-based supercapacitor.

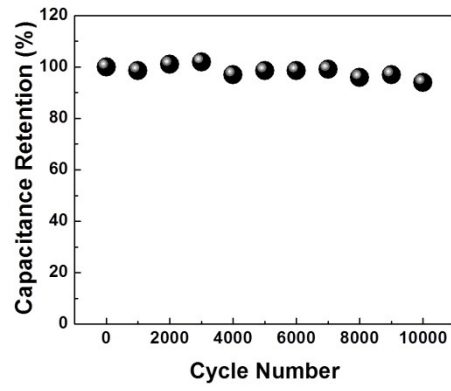

**Fig. S4** Charge-discharge cycling stability of solid-state MWCNT/V<sub>2</sub>O<sub>5</sub>/MWCNT (90 wt% of V<sub>2</sub>O<sub>5</sub>) fiber-based supercapacitor at current density of 1.0 A cm<sup>-3</sup>.

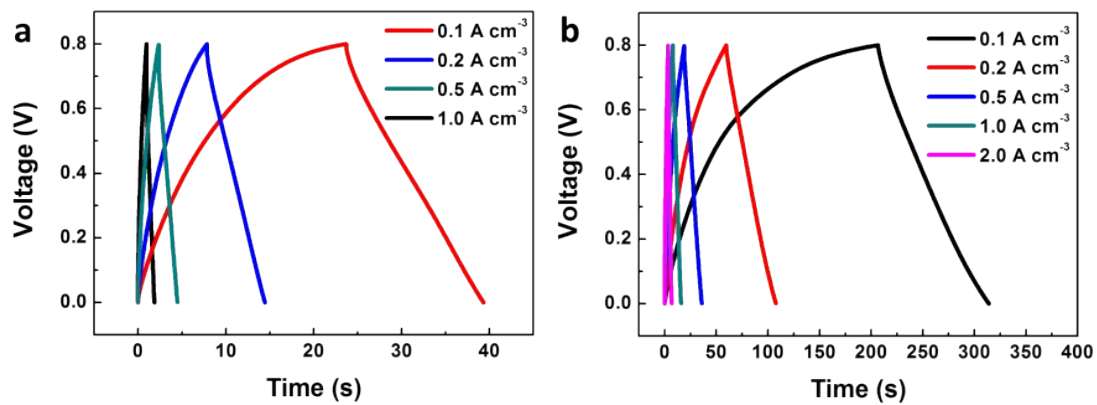

**Fig. S5** Charge-discharge curves of MWCNT/V<sub>2</sub>O<sub>5</sub>/MWCNT fiber-based supercapacitors as a function of current density: (a) 30 wt% and (b) 60 wt% of V<sub>2</sub>O<sub>5</sub>.

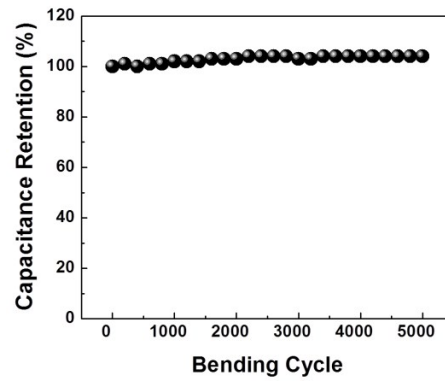

**Fig. S6** Capacitance retention of the MWCNT/V<sub>2</sub>O<sub>5</sub>/MWCNT fiber-based supercapacitor after 5000 bending-unbending cycles.
